# Supplementary material for: Rate coefficients and product branching ratios for (E)-2-butenal + H reactions
Source: Royal Society of Chemistry journal article supplement (doi:10.1039/d0cp02142c), 2020-01-01
Supplement: d0cp02142c1.pdf [file d0cp02142c1.pdf]

## Electronic Supplementary Information (ESI)

# Rate Coefficients and Product Branching Ratios for (E)-2-Butenal + H Reactions

Maiara Oliveira Passos, Igor Araujo Lins, and Tiago Vinicius Alves\*

*<sup>b</sup>Departamento de Físico-Química, Instituto de Química, Universidade Federal da Bahia,  
Rua Barão de Jeremoabo, 147, Salvador, Bahia, 40170-115, Brazil*

\*E-mail address: [tiagova@ufba.br](mailto:tiagova@ufba.br)

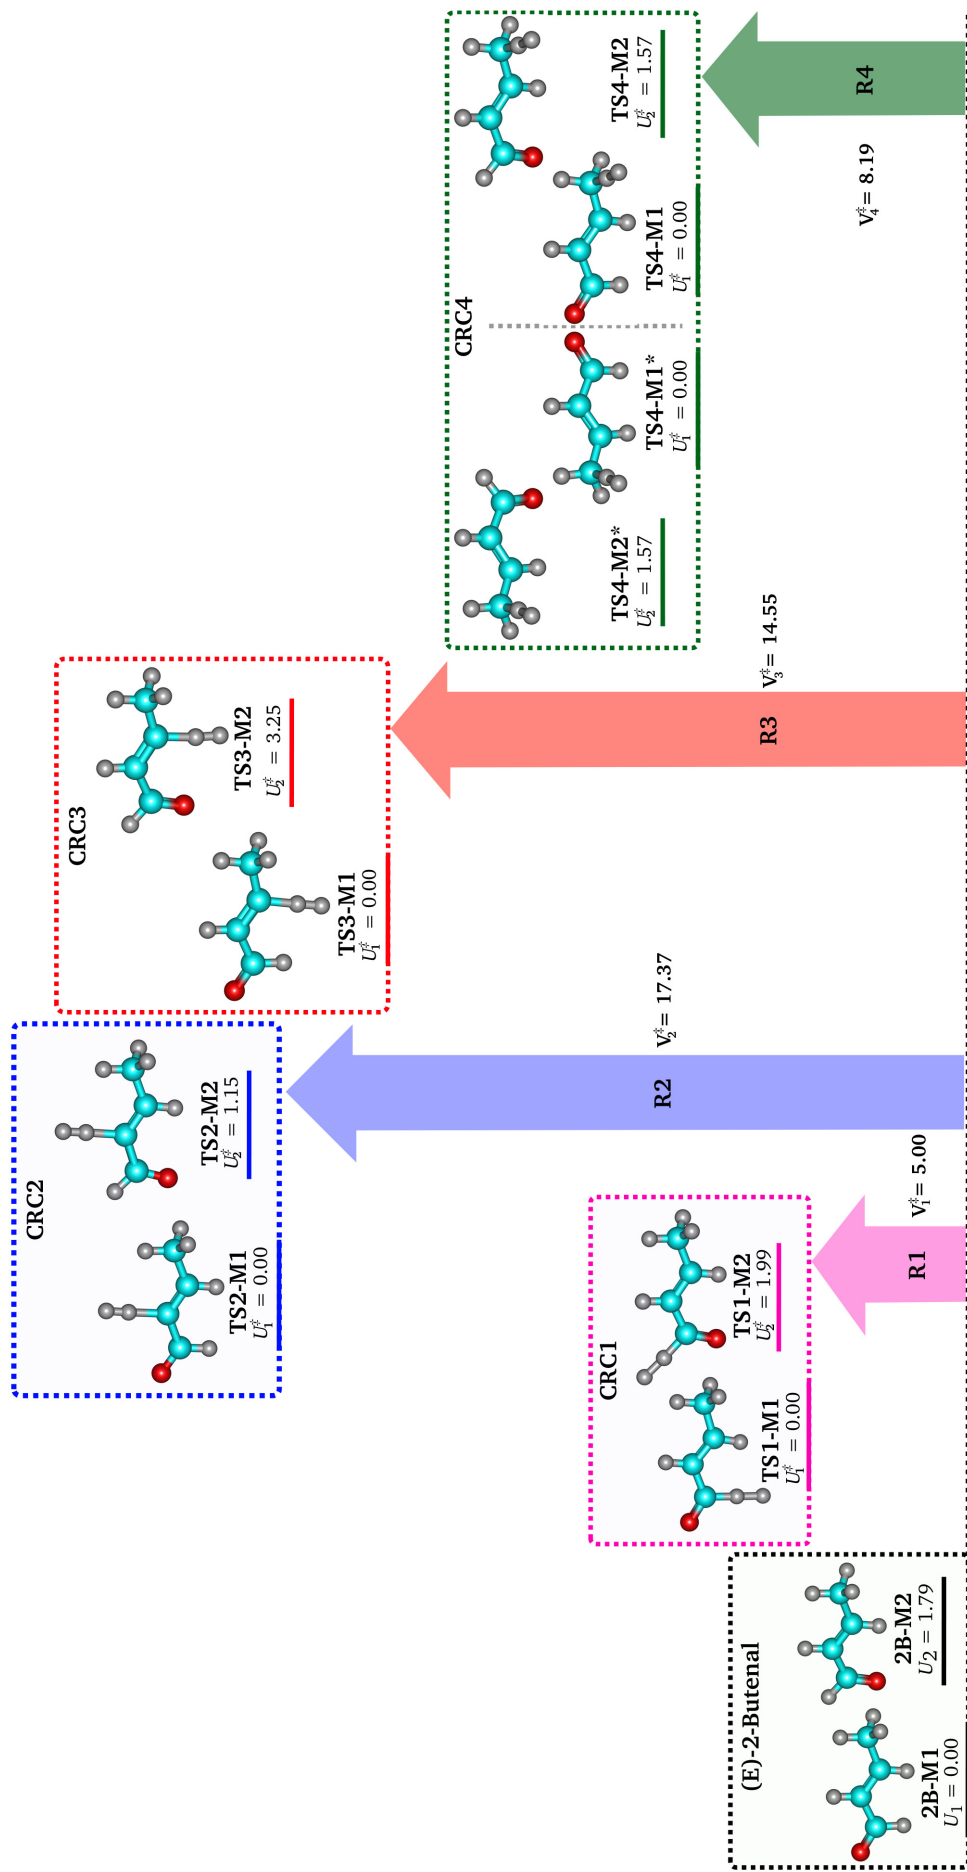

Figure S1: Energetic profile showing the difference in energy between all conformations of (E)-2-butene and transition states structure of each CRC, and the forward classical barriers for (R1)-(R4). The relative energies (in kcal/mol) are calculated at the MPWB1K/6-31+G(d,p) level of theory.

Table S1: Cartesian coordinates (in Å) and non-scaled vibrational frequencies (in  $\text{cm}^{-1}$ ) for the 2B-M1

| Cartesian Coordinates                          |           |           |           |
|------------------------------------------------|-----------|-----------|-----------|
| Element                                        | X         | Y         | Z         |
| C                                              | -0.127307 | 0.000014  | -0.073142 |
| C                                              | -0.105061 | 0.000010  | 1.385164  |
| C                                              | 1.052924  | 0.000003  | 2.042501  |
| C                                              | 1.211701  | -0.000002 | 3.515637  |
| H                                              | 0.866260  | -0.000017 | -0.554827 |
| H                                              | -1.058919 | 0.000016  | 1.893797  |
| H                                              | 1.966650  | -0.000002 | 1.456936  |
| H                                              | 0.252440  | 0.000021  | 4.023646  |
| H                                              | 1.776262  | -0.873335 | 3.839046  |
| H                                              | 1.776307  | 0.873301  | 3.839049  |
| O                                              | -1.130203 | -0.000008 | -0.740095 |
| Vibrational Frequencies                        |           |           |           |
| 3272.3928                                      | 3229.1692 | 3211.8864 | 3181.3963 |
| 3114.2932                                      | 2998.7855 | 1875.3468 | 1780.9350 |
| 1513.7213                                      | 1506.6561 | 1445.8117 | 1437.6289 |
| 1350.1399                                      | 1301.0687 | 1203.0475 | 1139.1440 |
| 1096.6137                                      | 1057.0042 | 1030.1160 | 960.6809  |
| 814.0989                                       | 553.7997  | 465.3252  | 301.7063  |
| 203.6354                                       | 201.6211  | 130.1352  |           |
| Energy MPWB1K/6-31+G(d,p) (a.u.): -231.1225483 |           |           |           |

Table S2: Cartesian coordinates (in Å) and non-scaled vibrational frequencies (in  $\text{cm}^{-1}$ ) for the 2B-M2

| Cartesian Coordinates                          |           |           |           |
|------------------------------------------------|-----------|-----------|-----------|
| Element                                        | X         | Y         | Z         |
| C                                              | -0.149836 | 0.010822  | -0.077243 |
| C                                              | -0.113003 | 0.008037  | 1.389621  |
| C                                              | 1.044731  | 0.007666  | 2.047573  |
| C                                              | 1.196674  | 0.004958  | 3.520239  |
| H                                              | -1.154090 | 0.010908  | -0.528921 |
| H                                              | -1.059219 | 0.006303  | 1.913577  |
| H                                              | 1.948084  | 0.009509  | 1.448969  |
| H                                              | 0.237345  | 0.003242  | 4.029013  |
| H                                              | 1.763405  | -0.867672 | 3.842441  |
| H                                              | 1.762059  | 0.877217  | 3.84579   |
| O                                              | 0.826587  | 0.012924  | -0.784996 |
| Vibrational Frequencies                        |           |           |           |
| 3255.3823                                      | 3247.1338 | 3215.0219 | 3179.4551 |
| 3112.1202                                      | 3033.2019 | 1873.5144 | 1765.8484 |
| 1513.5736                                      | 1506.2959 | 1466.4420 | 1440.9949 |
| 1350.6235                                      | 1343.6312 | 1176.2937 | 1104.6826 |
| 1066.2487                                      | 1061.2413 | 1027.7935 | 922.1058  |
| 793.5765                                       | 758.8636  | 401.2674  | 245.5252  |
| 208.2092                                       | 204.7759  | 144.5907  |           |
| Energy MPWB1K/6-31+G(d,p) (a.u.): -231.1196897 |           |           |           |

Table S3: Cartesian coordinates (in Å) and non-scaled vibrational frequencies (in  $\text{cm}^{-1}$ ) for the TS1-M1

| Cartesian Coordinates                          |           |           |           |
|------------------------------------------------|-----------|-----------|-----------|
| Element                                        | X         | Y         | Z         |
| C                                              | -0.075887 | -0.000763 | -0.06802  |
| C                                              | -0.080182 | -0.000669 | 1.387196  |
| C                                              | 1.069771  | 0.000282  | 2.059839  |
| C                                              | 1.197284  | 0.000479  | 3.534526  |
| H                                              | 1.096259  | 0.000137  | -0.553033 |
| H                                              | -1.043984 | -0.001397 | 1.879513  |
| H                                              | 1.990516  | 0.00097   | 1.488032  |
| H                                              | 0.229427  | -0.000248 | 4.025717  |
| H                                              | 1.758478  | -0.871936 | 3.865838  |
| H                                              | 1.757109  | 0.873816  | 3.865724  |
| O                                              | -1.013906 | -0.001558 | -0.799228 |
| H                                              | 2.072014  | 0.000887  | -0.945486 |
| Vibrational Frequencies                        |           |           |           |
| 1408.4163i                                     | 3252.0206 | 3241.3230 | 3221.6288 |
| 3184.4586                                      | 3116.1776 | 1943.7559 | 1772.1914 |
| 1511.6805                                      | 1505.9437 | 1442.7926 | 1431.0303 |
| 1367.3666                                      | 1325.3162 | 1299.5668 | 1166.1616 |
| 1161.8096                                      | 1101.6217 | 1099.7816 | 1019.7629 |
| 958.8218                                       | 824.1526  | 539.9781  | 484.6194  |
| 423.9928                                       | 363.4318  | 222.1255  | 220.9368  |
| 195.856                                        | 118.7017  |           |           |
| Energy MPWB1K/6-31+G(d,p) (a.u.): -231.6105357 |           |           |           |

Table S4: Cartesian coordinates (in Å) and non-scaled vibrational frequencies (in  $\text{cm}^{-1}$ ) for the TS1-M2

| Cartesian Coordinates                          |           |           |           |
|------------------------------------------------|-----------|-----------|-----------|
| Element                                        | X         | Y         | Z         |
| C                                              | -0.066151 | 0.029979  | -0.093126 |
| C                                              | -0.076274 | 0.012646  | 1.369030  |
| C                                              | 1.063733  | 0.011107  | 2.058841  |
| C                                              | 1.170128  | -0.005715 | 3.534811  |
| H                                              | -1.232116 | 0.029042  | -0.586235 |
| H                                              | -1.042230 | 0.001331  | 1.852502  |
| H                                              | 1.986981  | 0.023164  | 1.491641  |
| H                                              | 0.196076  | -0.017023 | 4.013800  |
| H                                              | 1.731963  | -0.879067 | 3.863258  |
| H                                              | 1.721843  | 0.866090  | 3.883877  |
| O                                              | 0.878442  | 0.044023  | -0.817929 |
| H                                              | -2.215944 | 0.027514  | -0.939889 |
| Vibrational Frequencies                        |           |           |           |
| 1415.6485 <i>i</i>                             | 3275.1824 | 3245.7417 | 3220.4282 |
| 3182.2192                                      | 3114.3301 | 1938.4793 | 1755.9533 |
| 1510.3169                                      | 1504.4048 | 1441.8901 | 1438.5795 |
| 1366.9429                                      | 1341.9460 | 1280.9430 | 1168.0481 |
| 1166.9265                                      | 1103.3459 | 1055.8758 | 1026.0923 |
| 925.1171                                       | 805.4245  | 719.6160  | 398.0810  |
| 373.1760                                       | 304.4104  | 208.5277  | 195.3660  |
| 190.5107                                       | 110.7882  |           |           |
| Energy MPWB1K/6-31+G(d,p) (a.u.): -231.6073621 |           |           |           |

Table S5: Cartesian coordinates (in Å) and non-scaled vibrational frequencies (in  $\text{cm}^{-1}$ ) for the TS2-M1

| Cartesian Coordinates                          |           |           |           |
|------------------------------------------------|-----------|-----------|-----------|
| Element                                        | X         | Y         | Z         |
| C                                              | -0.132250 | -0.000010 | -0.102464 |
| C                                              | 0.011187  | 0.000001  | 1.342326  |
| C                                              | 1.138461  | -0.000013 | 2.031509  |
| C                                              | 1.262781  | -0.000001 | 3.510653  |
| H                                              | 0.833614  | -0.000032 | -0.644141 |
| H                                              | -1.272123 | 0.000032  | 2.074404  |
| H                                              | 2.070890  | -0.000035 | 1.467059  |
| H                                              | 0.291339  | 0.000023  | 3.992960  |
| H                                              | 1.819908  | -0.874272 | 3.843024  |
| H                                              | 1.819944  | 0.874252  | 3.843007  |
| O                                              | -1.171379 | 0.000004  | -0.705900 |
| H                                              | -1.996091 | 0.000051  | 2.509298  |
| Vibrational Frequencies                        |           |           |           |
| 999.5811 <i>i</i>                              | 3236.1371 | 3186.6298 | 3150.4093 |
| 3118.4941                                      | 2955.9249 | 2341.1694 | 1866.7649 |
| 1770.6437                                      | 1513.1751 | 1507.6724 | 1441.7546 |
| 1431.1312                                      | 1307.4704 | 1178.3468 | 1129.6055 |
| 1085.3450                                      | 1034.6272 | 1030.0951 | 952.1331  |
| 943.5093                                       | 822.2652  | 575.1250  | 462.6525  |
| 256.0735                                       | 250.6831  | 238.7411  | 185.3293  |
| 175.0983                                       | 108.5051  |           |           |
| Energy MPWB1K/6-31+G(d,p) (a.u.): -231.5908257 |           |           |           |

Table S6: Cartesian coordinates (in Å) and non-scaled vibrational frequencies (in  $\text{cm}^{-1}$ ) for the TS2-M2

| Cartesian Coordinates                          |           |           |           |
|------------------------------------------------|-----------|-----------|-----------|
| Element                                        | X         | Y         | Z         |
| C                                              | -0.146858 | -0.001681 | -0.109539 |
| C                                              | 0.020010  | 0.002846  | 1.341034  |
| C                                              | 1.140586  | 0.012158  | 2.040646  |
| C                                              | 1.251114  | 0.016365  | 3.519895  |
| H                                              | -1.181380 | -0.009629 | -0.478941 |
| H                                              | -1.254519 | -0.004178 | 2.073712  |
| H                                              | 2.067062  | 0.017178  | 1.469876  |
| H                                              | 0.277259  | 0.010804  | 3.997953  |
| H                                              | 1.813588  | -0.852564 | 3.857655  |
| H                                              | 1.801613  | 0.894487  | 3.853582  |
| O                                              | 0.781327  | 0.002882  | -0.879286 |
| H                                              | -1.998576 | -0.008309 | 2.487902  |
| Vibrational Frequencies                        |           |           |           |
| 1040.4416i                                     | 3231.4908 | 3185.5113 | 3178.5978 |
| 3117.4173                                      | 3063.8890 | 2271.1577 | 1843.3768 |
| 1759.9580                                      | 1512.3196 | 1507.8598 | 1455.1858 |
| 1439.0856                                      | 1302.1071 | 1165.8194 | 1138.6074 |
| 1088.2012                                      | 1056.4554 | 1054.0192 | 971.2754  |
| 887.3339                                       | 829.9777  | 728.4333  | 401.2153  |
| 253.4849                                       | 249.1521  | 221.4634  | 179.6356  |
| 173.2951                                       | 43.6608   |           |           |
| Energy MPWB1K/6-31+G(d,p) (a.u.): -231.5889931 |           |           |           |



Table S7: Cartesian coordinates (in Å) and non-scaled vibrational frequencies (in  $\text{cm}^{-1}$ ) for the TS3-M1

| Cartesian Coordinates                          |           |           |           |
|------------------------------------------------|-----------|-----------|-----------|
| Element                                        | X         | Y         | Z         |
| C                                              | -0.077713 | 0.003816  | -0.120344 |
| C                                              | -0.099513 | 0.003002  | 1.343047  |
| C                                              | 1.008335  | 0.003595  | 2.062920  |
| C                                              | 1.275560  | 0.003049  | 3.505511  |
| H                                              | 0.922689  | 0.004953  | -0.579154 |
| H                                              | -1.079694 | 0.001879  | 1.810025  |
| H                                              | 2.209755  | 0.005072  | 1.307284  |
| H                                              | 0.348356  | 0.001916  | 4.076763  |
| H                                              | 1.858004  | -0.872423 | 3.786476  |
| H                                              | 1.856449  | 0.879249  | 3.787426  |
| O                                              | -1.070562 | 0.003304  | -0.801259 |
| H                                              | 2.964571  | 0.005985  | 0.859002  |
| Vibrational Frequencies                        |           |           |           |
| 1243.1706i                                     | 3205.2554 | 3193.6451 | 3192.7109 |
| 3106.0483                                      | 3043.2866 | 1971.9493 | 1870.0373 |
| 1770.6926                                      | 1500.6529 | 1490.5139 | 1445.2884 |
| 1428.1519                                      | 1261.8063 | 1178.7011 | 1150.1971 |
| 1089.6762                                      | 1078.9297 | 1051.7414 | 1019.4902 |
| 969.1424                                       | 836.2949  | 535.1024  | 450.1237  |
| 329.9868                                       | 318.6896  | 243.9720  | 196.8483  |
| 161.8824                                       | 123.9598  |           |           |
| Energy MPWB1K/6-31+G(d,p) (a.u.): -231.5953211 |           |           |           |

Table S8: Cartesian coordinates (in Å) and non-scaled vibrational frequencies (in  $\text{cm}^{-1}$ ) for the TS3-M2

| Cartesian Coordinates                          |           |           |           |
|------------------------------------------------|-----------|-----------|-----------|
| Element                                        | X         | Y         | Z         |
| C                                              | -0.130505 | 0.031070  | -0.136344 |
| C                                              | -0.095442 | 0.015568  | 1.334724  |
| C                                              | 1.015830  | 0.009969  | 2.050220  |
| C                                              | 1.262095  | -0.004892 | 3.496076  |
| H                                              | -1.143056 | 0.033864  | -0.570235 |
| H                                              | -1.059467 | 0.008550  | 1.836329  |
| H                                              | 2.251849  | 0.019877  | 1.321088  |
| H                                              | 0.330617  | -0.012520 | 4.060780  |
| H                                              | 1.845325  | -0.881470 | 3.773008  |
| H                                              | 1.842221  | 0.867695  | 3.791515  |
| O                                              | 0.833969  | 0.040391  | -0.855477 |
| H                                              | 3.032270  | 0.025180  | 0.950820  |
| Vibrational Frequencies                        |           |           |           |
| 1198.9300i                                     | 3189.8738 | 3189.2313 | 3185.4807 |
| 3102.8006                                      | 3027.4305 | 2087.7272 | 1879.2032 |
| 1754.5133                                      | 1500.2966 | 1490.0064 | 1465.0629 |
| 1430.0891                                      | 1319.0238 | 1132.5232 | 1110.6015 |
| 1073.1057                                      | 1059.2017 | 1046.5445 | 1005.1681 |
| 911.7945                                       | 798.3973  | 754.9574  | 366.4809  |
| 323.1910                                       | 299.8967  | 222.0230  | 210.5074  |
| 159.6228                                       | 76.7134   |           |           |
| Energy MPWB1K/6-31+G(d,p) (a.u.): -231.5901445 |           |           |           |

Table S9: Cartesian coordinates (in Å) and non-scaled vibrational frequencies (in  $\text{cm}^{-1}$ ) for the TS4-M1

| Cartesian Coordinates                          |           |           |           |
|------------------------------------------------|-----------|-----------|-----------|
| Element                                        | X         | Y         | Z         |
| C                                              | -0.133212 | -0.907330 | -0.233300 |
| C                                              | -0.127682 | -0.731520 | 1.211692  |
| C                                              | 0.987116  | -0.346462 | 1.847051  |
| C                                              | 1.114732  | -0.174863 | 3.284142  |
| H                                              | 0.829997  | -0.706625 | -0.733450 |
| H                                              | -1.054652 | -0.917303 | 1.735741  |
| H                                              | 1.877776  | -0.180534 | 1.251150  |
| H                                              | 0.176684  | -0.138548 | 3.825772  |
| H                                              | 1.666861  | -1.192368 | 3.750437  |
| H                                              | 1.800753  | 0.604324  | 3.595842  |
| O                                              | -1.097103 | -1.245141 | -0.873646 |
| H                                              | 2.094275  | -2.001756 | 4.218950  |
| Vibrational Frequencies                        |           |           |           |
| 1650.0671 <i>i</i>                             | 3272.7284 | 3270.6372 | 3224.1969 |
| 3182.5136                                      | 3005.0700 | 1859.9523 | 1733.9959 |
| 1505.0414                                      | 1442.8994 | 1374.9327 | 1361.8458 |
| 1344.8271                                      | 1336.4210 | 1295.3645 | 1200.0429 |
| 1160.2422                                      | 1074.2802 | 1049.8262 | 1017.5643 |
| 984.4824                                       | 845.1954  | 599.8914  | 551.7619  |
| 458.5635                                       | 404.3299  | 254.7436  | 204.7340  |
| 175.3615                                       | 119.4956  |           |           |
| Energy MPWB1K/6-31+G(d,p) (a.u.): -231.6054565 |           |           |           |

Table S10: Cartesian coordinates (in Å) and non-scaled vibrational frequencies (in  $\text{cm}^{-1}$ ) for the TS4-M2

| Cartesian Coordinates                          |           |           |           |
|------------------------------------------------|-----------|-----------|-----------|
| Element                                        | X         | Y         | Z         |
| C                                              | -0.166717 | -0.906950 | -0.241465 |
| C                                              | -0.153030 | -0.751963 | 1.214139  |
| C                                              | 0.962663  | -0.380976 | 1.856985  |
| C                                              | 1.083177  | -0.233233 | 3.296257  |
| H                                              | -1.130429 | -1.205290 | -0.681412 |
| H                                              | -1.074334 | -0.938957 | 1.748576  |
| H                                              | 1.843670  | -0.212290 | 1.250225  |
| H                                              | 0.143898  | -0.207142 | 3.837166  |
| H                                              | 1.635700  | -1.250219 | 3.746422  |
| H                                              | 1.766423  | 0.543093  | 3.621683  |
| O                                              | 0.791336  | -0.728418 | -0.953761 |
| H                                              | 2.065026  | -2.070434 | 4.216605  |
| Vibrational Frequencies                        |           |           |           |
| 1644.2511 <i>i</i>                             | 3268.6884 | 3259.9063 | 3248.8107 |
| 3179.0243                                      | 3035.8280 | 1858.4971 | 1715.7764 |
| 1505.8143                                      | 1464.2169 | 1388.4525 | 1366.3305 |
| 1357.0346                                      | 1331.4759 | 1319.9084 | 1189.8889 |
| 1083.1866                                      | 1067.5485 | 1059.3730 | 1012.5255 |
| 943.1908                                       | 824.3824  | 762.7700  | 591.4961  |
| 393.5958                                       | 382.4876  | 236.1212  | 200.6561  |
| 183.1629                                       | 120.5420  |           |           |
| Energy MPWB1K/6-31+G(d,p) (a.u.): -231.6029627 |           |           |           |

Table S11: Cartesian coordinates (in Å) and non-scaled vibrational frequencies (in  $\text{cm}^{-1}$ ) for the  $\text{CH}_3\text{CH}=\text{CHCO}$

| Cartesian Coordinates             |           |           |              |
|-----------------------------------|-----------|-----------|--------------|
| Element                           | X         | Y         | Z            |
| C                                 | -0.147656 | -0.000137 | -0.052455    |
| C                                 | -0.119286 | -0.000050 | 1.404569     |
| C                                 | 1.047566  | -0.000073 | 2.047039     |
| C                                 | 1.212427  | 0.000008  | 3.517891     |
| H                                 | -1.068854 | 0.000032  | 1.928406     |
| H                                 | 1.948555  | -0.000158 | 1.446226     |
| H                                 | 0.257400  | 0.000088  | 4.033760     |
| H                                 | 1.780828  | -0.872999 | 3.835217     |
| H                                 | 1.780916  | 0.872998  | 3.835111     |
| O                                 | -1.078673 | -0.000132 | -0.778094    |
| Vibrational Frequencies           |           |           |              |
| 3250.1673                         | 3222.2346 | 3221.0318 | 3183.4994    |
| 3115.4605                         | 1990.7840 | 1767.7626 | 1509.8354    |
| 1505.4697                         | 1441.2283 | 1347.7694 | 1297.3102    |
| 1167.5767                         | 1101.8484 | 1099.9901 | 1011.7375    |
| 946.3818                          | 820.2462  | 519.1490  | 466.8835     |
| 337.3411                          | 207.3927  | 204.0627  | 116.2663     |
| Energy MPWB1K/6-31+G(d,p) (a.u.): |           |           | -230.4731246 |

Table S12: Cartesian coordinates (in Å) and non-scaled vibrational frequencies (in  $\text{cm}^{-1}$ ) for the  $\text{CH}_3\text{CH}=\dot{\text{C}}\text{COH}$

| Cartesian Coordinates                          |           |           |           |
|------------------------------------------------|-----------|-----------|-----------|
| Element                                        | X         | Y         | Z         |
| C                                              | -0.168679 | -0.000058 | -0.107691 |
| C                                              | 0.031386  | -0.000089 | 1.326073  |
| C                                              | 1.127625  | 0.000042  | 2.052850  |
| C                                              | 1.198497  | -0.000003 | 3.537422  |
| H                                              | 0.784271  | 0.000112  | -0.673644 |
| H                                              | 2.080426  | 0.000212  | 1.520834  |
| H                                              | 0.209250  | -0.000163 | 3.980902  |
| H                                              | 1.742402  | -0.875029 | 3.888877  |
| H                                              | 1.742148  | 0.875153  | 3.888944  |
| O                                              | -1.221411 | -0.000194 | -0.685389 |
| Vibrational Frequencies                        |           |           |           |
| 3239.5673                                      | 3188.3177 | 3133.4832 | 3118.7252 |
| 2945.0128                                      | 1864.7484 | 1787.5628 | 1509.3068 |
| 1509.0659                                      | 1437.0800 | 1425.2739 | 1294.2918 |
| 1160.6509                                      | 1124.5397 | 1080.4320 | 1017.3690 |
| 935.8914                                       | 789.4991  | 545.6963  | 437.3385  |
| 212.3120                                       | 197.2083  | 160.9111  | 101.5023  |
| Energy MPWB1K/6-31+G(d,p) (a.u.): -230.4350400 |           |           |           |

Table S13: Cartesian coordinates (in Å) and non-scaled vibrational frequencies (in  $\text{cm}^{-1}$ ) for the  $\text{CH}_3\dot{\text{C}}=\text{CHCOH}$

| Cartesian Coordinates                          |           |           |           |
|------------------------------------------------|-----------|-----------|-----------|
| Element                                        | X         | Y         | Z         |
| C                                              | -0.106643 | -0.000001 | -0.092004 |
| C                                              | -0.205522 | 0.000012  | 1.368974  |
| C                                              | 0.860048  | -0.000009 | 2.137932  |
| C                                              | 1.245628  | -0.000007 | 3.540404  |
| H                                              | 0.917091  | -0.000031 | -0.495014 |
| H                                              | -1.210692 | 0.000043  | 1.785365  |
| H                                              | 0.365749  | 0.000022  | 4.188500  |
| H                                              | 1.843988  | -0.877634 | 3.775944  |
| H                                              | 1.844035  | 0.877591  | 3.775929  |
| O                                              | -1.062525 | 0.000018  | -0.824375 |
| Vibrational Frequencies                        |           |           |           |
| 3198.2262                                      | 3173.4394 | 3172.1601 | 3081.3989 |
| 3043.8249                                      | 1866.6121 | 1797.2179 | 1491.9016 |
| 1480.2582                                      | 1444.2031 | 1421.9092 | 1255.4545 |
| 1168.0129                                      | 1087.7513 | 1059.5312 | 1045.6205 |
| 958.3914                                       | 803.7351  | 527.2394  | 420.6062  |
| 312.2002                                       | 169.8338  | 151.2648  | 120.5677  |
| Energy MPWB1K/6-31+G(d,p) (a.u.): -230.4437113 |           |           |           |

Table S14: Cartesian coordinates (in Å) and non-scaled vibrational frequencies (in  $\text{cm}^{-1}$ ) for the  $\dot{\text{C}}\text{H}_2\text{CH}=\text{CHCOH}$

| Cartesian Coordinates                          |           |           |           |
|------------------------------------------------|-----------|-----------|-----------|
| Element                                        | X         | Y         | Z         |
| C                                              | -0.089297 | 0.028145  | -0.121104 |
| C                                              | -0.099299 | -0.025836 | 1.313039  |
| C                                              | 1.074486  | -0.131992 | 2.053695  |
| C                                              | 1.115841  | -0.186647 | 3.415456  |
| H                                              | 0.902257  | -0.019469 | -0.598991 |
| H                                              | -1.061525 | 0.019367  | 1.803306  |
| H                                              | 2.008081  | -0.173073 | 1.505670  |
| H                                              | 0.209388  | -0.148772 | 4.000339  |
| H                                              | 2.049375  | -0.268899 | 3.947440  |
| O                                              | -1.092730 | 0.120652  | -0.800712 |
| Vibrational Frequencies                        |           |           |           |
| 3347.9246                                      | 3274.4875 | 3243.3597 | 3235.6700 |
| 3025.1160                                      | 1751.6448 | 1571.7451 | 1527.3422 |
| 1448.6623                                      | 1327.2789 | 1311.9309 | 1259.7071 |
| 1186.7315                                      | 1041.7083 | 1013.3548 | 989.0932  |
| 912.4174                                       | 832.0997  | 586.8066  | 552.4691  |
| 471.8208                                       | 273.5588  | 211.0873  | 148.9446  |
| Energy MPWB1K/6-31+G(d,p) (a.u.): -230.4811000 |           |           |           |



Table S15: Cartesian coordinates (in Å) and non-scaled vibrational frequencies (in  $\text{cm}^{-1}$ ) for the  $\text{H}_2$

| Cartesian Coordinates                            |          |          |          |
|--------------------------------------------------|----------|----------|----------|
| Element                                          | X        | Y        | Z        |
| H                                                | 0.000000 | 0.000000 | 0.131093 |
| H                                                | 0.000000 | 0.000000 | 0.868907 |
| Vibrational Frequencies                          |          |          |          |
| 4535.8789                                        |          |          |          |
| Energy MPWB1K/6-31+G(d,p) (a.u.): -1.16489677538 |          |          |          |

Table S16: Cartesian coordinates (in Å) for the H

| Cartesian Coordinates                        |          |          |          |
|----------------------------------------------|----------|----------|----------|
| Element                                      | X        | Y        | Z        |
| H                                            | 0.000000 | 0.000000 | 0.000000 |
| Energy MPWB1K/6-31+G(d,p) (a.u.): -0.4959576 |          |          |          |

## Torsional Potential Energy Surface

The potential  $V_{\text{tor}}(\phi_1, \phi_2)$  are obtained from a fit to Fourier series of the type

$$\begin{aligned}
 V_{\text{tor}}(\phi_1, \phi_2) = & V_1(\phi_1) + V_2(\phi_1) + \\
 & \sum_{L_1=1}^{L_{1,max}} \sum_{L_2=1}^{L_{2,max}} c_{L_1 L_2} \cos(L_1 \phi_1) \cos(L_2 \phi_2) + \\
 & \sum_{P_1=1}^{P_{1,max}} \sum_{P_2=1}^{P_{2,max}} d_{P_1 P_2} \sin(P_1 \phi_1) \sin(P_2 \phi_2) + \tag{1}
 \end{aligned}$$

where  $c_{L_1 L_2}$  ( $L_1 = 1, \dots, L_{1,max}$ ,  $L_2 = 1, \dots, L_{2,max}$ ) and  $d_{P_1 P_2}$  ( $P_1 = 1, \dots, P_{1,max}$ ,  $P_2 = 1, \dots, P_{2,max}$ ) are fitting parameters.  $L_{1,max}$ ,  $L_{2,max}$ ,  $P_{1,max}$ , and  $P_{2,max}$ , indicate the largest number of each series.

The one-dimensional potentials are:

$$V_1(\phi_1) = a_0 + \sum_{M=1}^{M_{max}} a_M \cos(M \phi_1) \tag{2}$$

and

$$V_2(\phi_2) = b_0 + \sum_{N=1}^{N_{max}} b_N \cos(N \phi_2) \tag{3}$$

where,  $a_0$ ,  $b_0$ ,  $a_M$  ( $M = 1, \dots, M_{max}$ ) and  $b_N$  ( $N = 1, \dots, N_{max}$ ) are fitting parameters.  $M_{max}$  and  $N_{max}$ , are the largest number of each series.

Table S17: Parameters (in  $\text{cm}^{-1}$ ) used to fit by Fourier series the two-dimensional torsional potential for (E)-2-butenal (including coupling parameters).

| Parameters       |                      |
|------------------|----------------------|
| $a_0$            | +1942.79565          |
| $a_1$            | -200.91937           |
| $a_2$            | -1483.33282          |
| $a_3$            | -139.36742           |
| $a_4$            | +199.24267           |
| $a_5$            | +15.45355            |
| $a_6$            | -41.77088            |
| $a_7$            | -4.19294             |
| $a_8$            | +13.05390            |
| $b_3$            | -331.05911           |
| $b_6$            | +10.27008            |
| $b_9$            | -0.52212             |
| $c_{13}, d_{13}$ | +14.63306, -11.37822 |
| $c_{23}, d_{23}$ | +11.48102, -18.57446 |
| $c_{33}, d_{33}$ | +1.51861, +1.58047   |
| $c_{43}, d_{43}$ | -3.47200, +4.67024   |
| $c_{53}, d_{53}$ | -0.23764, +0.15817   |
| $c_{63}, d_{63}$ | +1.06962, -1.12613   |
| $c_{73}, d_{73}$ | +0.00529, +0.47261   |
| $c_{83}, d_{83}$ | -0.45726, +0.81341   |
| $c_{16}, d_{16}$ | +0.33524, -0.56582   |
| $c_{26}, d_{26}$ | -1.45002, +0.31744   |
| $c_{36}, d_{36}$ | +0.07322, -1.04773   |
| $c_{46}, d_{46}$ | +0.76266, -1.24961   |
| $c_{56}, d_{56}$ | +0.00951, -0.27703   |
| $c_{66}, d_{66}$ | -0.20890, -0.22114   |
| $c_{76}, d_{76}$ | +0.06147, -0.28468   |
| $c_{86}, d_{86}$ | -0.12291, -0.44229   |
| $c_{19}, d_{19}$ | -0.98930, +0.54466   |
| $c_{29}, d_{29}$ | +0.24635, -0.27197   |
| $c_{39}, d_{39}$ | -0.09631, +0.01662   |
| $c_{49}, d_{49}$ | -0.00832, +0.04164   |
| $c_{59}, d_{59}$ | +0.24369, -0.35419   |
| $c_{69}, d_{69}$ | +0.06994, +0.05118   |

Continued on next page

Table S17 – continued from previous page

| Parameters       |                    |
|------------------|--------------------|
| $c_{79}, d_{79}$ | -0.16163, -0.14998 |
| $c_{89}, d_{89}$ | -0.03874, -0.11608 |

Table S18: Parameters (in  $\text{cm}^{-1}$ ) used to fit by Fourier series the two-dimensional torsional potential for CRC1 (including coupling parameters).

| Parameters       |                     |
|------------------|---------------------|
| $a_0$            | +1810.74692         |
| $a_1$            | -241.54122          |
| $a_2$            | -1316.76435         |
| $a_3$            | -151.23686          |
| $a_4$            | +198.57729          |
| $a_5$            | +41.99889           |
| $a_6$            | -42.19300           |
| $a_7$            | -9.94637            |
| $a_8$            | +15.01788           |
| $b_3$            | -328.05396          |
| $b_6$            | +9.96448            |
| $b_9$            | -0.41057            |
| $c_{13}, d_{13}$ | +9.76888, -6.23399  |
| $c_{23}, d_{23}$ | +8.96263, -24.15753 |
| $c_{33}, d_{33}$ | +1.11079, +2.08280  |
| $c_{43}, d_{43}$ | -3.76320, +6.20379  |
| $c_{53}, d_{53}$ | -0.67976, +0.07852  |
| $c_{63}, d_{63}$ | +1.07334, -2.21970  |
| $c_{73}, d_{73}$ | +0.25338, +0.16473  |
| $c_{83}, d_{83}$ | -0.69587, +1.45063  |
| $c_{16}, d_{16}$ | +0.58630, -1.21343  |
| $c_{26}, d_{26}$ | -1.41153, +0.51423  |
| $c_{36}, d_{36}$ | +0.02751, -1.09816  |
| $c_{46}, d_{46}$ | +0.87628, -1.47339  |
| $c_{56}, d_{56}$ | +0.03776, -0.32818  |
| $c_{66}, d_{66}$ | -0.22830, -0.19813  |
| $c_{76}, d_{76}$ | +0.04828, -0.30884  |
| $c_{86}, d_{86}$ | -0.12981, -0.55199  |
| $c_{19}, d_{19}$ | -1.18798, +0.60903  |
| $c_{29}, d_{29}$ | +0.33300, -0.27555  |
| $c_{39}, d_{39}$ | -0.05676, -0.02853  |
| $c_{49}, d_{49}$ | -0.04551, +0.07305  |
| $c_{59}, d_{59}$ | +0.27366, -0.39924  |
| $c_{69}, d_{69}$ | +0.08947, +0.04995  |

Continued on next page

Table S18 – continued from previous page

| Parameters       |                   |
|------------------|-------------------|
| $c_{79}, d_{79}$ | -0.19287,-0.18026 |
| $c_{89}, d_{89}$ | -0.07108,-0.12635 |

Table S19: Parameters (in  $\text{cm}^{-1}$ ) used to fit by Fourier series the two-dimensional torsional potential for CRC2 (including coupling parameters).

| Parameters       |                     |
|------------------|---------------------|
| $a_0$            | +1034.93889         |
| $a_1$            | -117.78218          |
| $a_2$            | -617.35798          |
| $a_3$            | -82.75887           |
| $a_4$            | +89.36228           |
| $a_5$            | -13.68510           |
| $a_6$            | -18.82553           |
| $a_7$            | +0.36820            |
| $a_8$            | +6.47374            |
| $b_3$            | -304.33212          |
| $b_6$            | +10.82540           |
| $b_9$            | -0.15193            |
| $c_{13}, d_{13}$ | +11.42417, -7.82978 |
| $c_{23}, d_{23}$ | +5.60927, +6.68146  |
| $c_{33}, d_{33}$ | +1.62426, -0.24179  |
| $c_{43}, d_{43}$ | -2.66180, -2.44468  |
| $c_{53}, d_{53}$ | +0.34429, +0.14377  |
| $c_{63}, d_{63}$ | +1.11106, +1.24637  |
| $c_{73}, d_{73}$ | -0.23541, +0.53692  |
| $c_{83}, d_{83}$ | -0.47548, +0.00707  |
| $c_{16}, d_{16}$ | +0.38476, -0.92753  |
| $c_{26}, d_{26}$ | -2.09969, -2.70681  |
| $c_{36}, d_{36}$ | +0.06064, -0.80257  |
| $c_{46}, d_{46}$ | +0.42839, -0.18171  |
| $c_{56}, d_{56}$ | -0.07447, -0.27524  |
| $c_{66}, d_{66}$ | -0.10893, -0.55274  |
| $c_{76}, d_{76}$ | +0.11668, -0.30741  |
| $c_{86}, d_{86}$ | -0.01875, -0.28605  |
| $c_{19}, d_{19}$ | -0.92377, +0.44077  |
| $c_{29}, d_{29}$ | +0.46168, -0.44649  |
| $c_{39}, d_{39}$ | -0.01941, +0.01282  |
| $c_{49}, d_{49}$ | -0.17515, +0.02987  |
| $c_{59}, d_{59}$ | +0.14631, -0.25368  |
| $c_{69}, d_{69}$ | +0.05869, +0.15875  |

Continued on next page

Table S19 – continued from previous page

| Parameters       |                    |
|------------------|--------------------|
| $c_{79}, d_{79}$ | -0.13712, -0.14125 |
| $c_{89}, d_{89}$ | -0.06615, -0.15854 |



Table S20: Parameters (in  $\text{cm}^{-1}$ ) used to fit by Fourier series the two-dimensional torsional potential for CRC3 (including coupling parameters).

| Parameters       |                     |
|------------------|---------------------|
| $a_0$            | +1914.57806         |
| $a_1$            | -466.87671          |
| $a_2$            | -1285.63630         |
| $a_3$            | -112.65084          |
| $a_4$            | +189.06161          |
| $a_5$            | -1.87906            |
| $a_6$            | -34.02690           |
| $a_7$            | -0.12796            |
| $a_8$            | +10.71416           |
| $b_3$            | -233.16223          |
| $b_6$            | +7.30751            |
| $b_9$            | -0.49738            |
| $c_{13}, d_{13}$ | +12.76976, -5.13297 |
| $c_{23}, d_{23}$ | +5.79362, -13.96958 |
| $c_{33}, d_{33}$ | +1.07186, +5.45895  |
| $c_{43}, d_{43}$ | -2.70946, -0.35225  |
| $c_{53}, d_{53}$ | +0.75521, +0.00524  |
| $c_{63}, d_{63}$ | +0.27981, -0.44664  |
| $c_{73}, d_{73}$ | +0.20382, +0.57974  |
| $c_{83}, d_{83}$ | -0.57476, +0.00221  |
| $c_{16}, d_{16}$ | -0.35521, +0.62917  |
| $c_{26}, d_{26}$ | -0.71617, +0.20336  |
| $c_{36}, d_{36}$ | +0.14812, -0.90745  |
| $c_{46}, d_{46}$ | +0.31372, -0.26262  |
| $c_{56}, d_{56}$ | -0.07696, -0.00148  |
| $c_{66}, d_{66}$ | -0.00435, -0.14965  |
| $c_{76}, d_{76}$ | -0.02445, -0.16783  |
| $c_{86}, d_{86}$ | -0.06700, -0.04960  |
| $c_{19}, d_{19}$ | -0.31538, -0.09045  |
| $c_{29}, d_{29}$ | -0.03931, -0.04254  |
| $c_{39}, d_{39}$ | -0.06590, +0.10818  |
| $c_{49}, d_{49}$ | +0.11358, -0.10552  |
| $c_{59}, d_{59}$ | +0.07052, -0.17595  |
| $c_{69}, d_{69}$ | -0.01143, +0.03237  |

Continued on next page

Table S20 – continued from previous page

| Parameters       |                    |
|------------------|--------------------|
| $c_{79}, d_{79}$ | -0.00677, -0.02755 |
| $c_{89}, d_{89}$ | -0.06261, -0.07667 |

Table S21: Parameters (in  $\text{cm}^{-1}$ ) used to fit by Fourier series the two-dimensional torsional potential for CRC4 (including coupling parameters).

| Parameters       |                      |
|------------------|----------------------|
| $a_0$            | +2587.19187          |
| $a_1$            | -163.26767           |
| $a_2$            | -1519.30034          |
| $a_3$            | -131.23943           |
| $a_4$            | +196.78200           |
| $a_5$            | +14.93042            |
| $a_6$            | -41.82678            |
| $a_7$            | -3.90435             |
| $a_8$            | +13.22472            |
| $b_1$            | +34.39882            |
| $b_2$            | +938.21384           |
| $b_3$            | -207.12122           |
| $b_4$            | +90.14449            |
| $b_5$            | -20.35260            |
| $b_6$            | +24.38168            |
| $b_7$            | -7.10353             |
| $b_8$            | +5.13389             |
| $c_{11}, d_{11}$ | +22.41554, -23.81130 |
| $c_{21}, d_{21}$ | +5.65890, -21.09229  |
| $c_{31}, d_{31}$ | -5.12162, +1.48183   |
| $c_{41}, d_{41}$ | -1.81764, +3.84514   |
| $c_{51}, d_{51}$ | +1.07385, -0.70877   |
| $c_{61}, d_{61}$ | +0.91667, -0.85601   |
| $c_{71}, d_{71}$ | -0.36383, +0.24064   |
| $c_{81}, d_{81}$ | -0.37222, +0.41444   |
| $c_{12}, d_{12}$ | -4.15169, -9.38520   |
| $c_{22}, d_{22}$ | +61.71244, +15.27658 |
| $c_{32}, d_{32}$ | -6.43865, -10.06612  |
| $c_{42}, d_{42}$ | -10.75712, +4.56080  |
| $c_{52}, d_{52}$ | -0.76670, +2.06663   |
| $c_{62}, d_{62}$ | +4.52472, -1.39973   |
| $c_{72}, d_{72}$ | +0.45581, -0.96705   |
| $c_{82}, d_{82}$ | -1.77525, +0.64042   |
| $c_{13}, d_{13}$ | +14.92587, -14.09373 |

Continued on next page

Table S21 – continued from previous page

| Parameters       |                     |
|------------------|---------------------|
| $c_{23}, d_{23}$ | +7.29995, -15.18460 |
| $c_{33}, d_{33}$ | +0.25957, -1.32437  |
| $c_{43}, d_{43}$ | -2.21401, +3.18678  |
| $c_{53}, d_{53}$ | -0.10353, +0.09918  |
| $c_{63}, d_{63}$ | +0.63376, -0.81238  |
| $c_{73}, d_{73}$ | +0.08341, +0.13523  |
| $c_{83}, d_{83}$ | -0.27704, +0.30006  |
| $c_{14}, d_{14}$ | -3.49896, -2.19127  |
| $c_{24}, d_{24}$ | +19.22350, +1.44701 |
| $c_{34}, d_{34}$ | -2.23652, -3.43943  |
| $c_{44}, d_{44}$ | -2.90725, +1.46655  |
| $c_{54}, d_{54}$ | -0.34750, +0.21176  |
| $c_{64}, d_{64}$ | +1.20712, -0.23816  |
| $c_{74}, d_{74}$ | -0.01222, -0.10070  |
| $c_{84}, d_{84}$ | +0.22805, +0.10093  |
| $c_{15}, d_{15}$ | +1.70103, -1.82547  |
| $c_{25}, d_{25}$ | -1.30399, -1.76236  |
| $c_{35}, d_{35}$ | +0.04997, -0.11988  |
| $c_{45}, d_{45}$ | +0.39323, -0.01652  |
| $c_{55}, d_{55}$ | +0.01957, -0.13492  |
| $c_{65}, d_{65}$ | -0.10640, +0.01612  |
| $c_{75}, d_{75}$ | -0.00331, +0.02556  |
| $c_{85}, d_{85}$ | +0.04862, -0.02675  |
| $c_{16}, d_{16}$ | -2.50912, +0.31264  |
| $c_{26}, d_{26}$ | +4.05092, +1.43338  |
| $c_{36}, d_{36}$ | -0.58921, -1.02129  |
| $c_{46}, d_{46}$ | -0.29350, +0.09298  |
| $c_{56}, d_{56}$ | -0.17809, -0.02617  |
| $c_{66}, d_{66}$ | +0.08944, +0.08402  |
| $c_{76}, d_{76}$ | -0.03517, -0.01340  |
| $c_{86}, d_{86}$ | -0.06428, -0.04661  |
| $c_{17}, d_{17}$ | +0.73290, -0.01591  |
| $c_{27}, d_{27}$ | -1.14947, -0.58711  |
| $c_{37}, d_{37}$ | +0.11491, +0.23698  |
| $c_{47}, d_{47}$ | +0.37258, -0.08950  |
| $c_{57}, d_{57}$ | +0.10026, -0.02441  |

Continued on next page

Table S21 – continued from previous page

---

| Parameters       |                    |
|------------------|--------------------|
| $c_{67}, d_{67}$ | -0.03387, +0.07483 |
| $c_{77}, d_{77}$ | +0.06771, +0.02807 |
| $c_{87}, d_{87}$ | +0.11926, -0.00924 |
| $c_{18}, d_{18}$ | -0.82678, -0.02635 |
| $c_{28}, d_{28}$ | +1.17362, +0.16916 |
| $c_{38}, d_{38}$ | -0.20086, -0.30440 |
| $c_{48}, d_{48}$ | -0.14421, +0.13343 |
| $c_{58}, d_{58}$ | -0.08185, -0.02927 |
| $c_{68}, d_{68}$ | -0.02206, -0.01281 |
| $c_{78}, d_{78}$ | -0.03806, +0.01218 |
| $c_{88}, d_{88}$ | -0.02566, +0.01039 |

---

Table S22: Translational, electronic, and rovibrational (MS-HO<sup>a</sup> and E2DT<sup>b</sup>) partition functions for the (E)-2-butenal.  $Q_T^{\text{MS-HO}}$  and  $Q_T^{\text{E2DT}}$  stands for the total partition functions<sup>c</sup>. Power of 10 in parentheses.

| T(K) | $Q_{\text{trans}}$ | $Q_{\text{elec}}$ | $Q^{\text{MS-HO}}$ | $Q^{\text{E2DT}}$ | $Q_T^{\text{MS-HO}}$ | $Q_T^{\text{E2DT}}$ |
|------|--------------------|-------------------|--------------------|-------------------|----------------------|---------------------|
| 200  | 4.617(+01)         | 1.000(+00)        | 1.396(+05)         | 1.370(+05)        | 6.446(+06)           | 6.326(+06)          |
| 300  | 8.482(+01)         | 1.000(+00)        | 7.764(+05)         | 7.913(+05)        | 6.586(+07)           | 6.712(+07)          |
| 400  | 1.306(+02)         | 1.000(+00)        | 3.790(+06)         | 3.990(+06)        | 4.949(+08)           | 5.211(+08)          |
| 500  | 1.825(+02)         | 1.000(+00)        | 1.718(+07)         | 1.852(+07)        | 3.135(+09)           | 3.380(+09)          |
| 600  | 2.399(+02)         | 1.000(+00)        | 7.365(+07)         | 8.066(+07)        | 1.767(+10)           | 1.935(+10)          |
| 700  | 3.023(+02)         | 1.000(+00)        | 3.001(+08)         | 3.323(+08)        | 9.074(+10)           | 1.005(+11)          |
| 800  | 3.694(+02)         | 1.000(+00)        | 1.165(+09)         | 1.299(+09)        | 4.303(+11)           | 4.798(+11)          |
| 900  | 4.408(+02)         | 1.000(+00)        | 4.315(+09)         | 4.835(+09)        | 1.902(+12)           | 2.131(+12)          |
| 1000 | 5.162(+02)         | 1.000(+00)        | 1.527(+10)         | 1.716(+10)        | 7.883(+12)           | 8.859(+12)          |
| 1500 | 9.484(+02)         | 1.000(+00)        | 4.604(+12)         | 5.139(+12)        | 4.365(+15)           | 4.872(+15)          |
| 2000 | 1.460(+03)         | 1.000(+00)        | 5.931(+14)         | 6.405(+14)        | 8.661(+17)           | 9.353(+17)          |
| 2500 | 2.041(+03)         | 1.000(+00)        | 3.962(+16)         | 4.083(+16)        | 8.085(+19)           | 8.332(+19)          |

<sup>a</sup> MS-OH (ZPE): 55.643 kcal/mol

<sup>b</sup> E2DT (ZPE): 55.636 kcal/mol

<sup>c</sup>  $Q_T^X = Q_{\text{trans}}Q_{\text{elec}}Q_{\text{rovib}}^X$ , where X = MS-HO or E2DT

Table S23: Components of the E2DT partition function for the (E)-2-butenal.  $Q_{\text{tor,cl}}^{(C)}$  is the classical torsional partition function,  $Q_{\text{tor}}^{2\text{D-NS}}$  a quantum version of the classical function, and  $Q^{\text{EHR}}$  the extended hindered-rotor (EHR) rovibrational partition function. Power of 10 in parentheses.

| T(K) | $Q_{\text{tor}}^{2\text{D-NS}}$ | $Q_{\text{tor,cl}}^{(C)}$ | $Q^{\text{EHR}}$ |
|------|---------------------------------|---------------------------|------------------|
| 200  | 2.156(+00)                      | 6.908(-01)                | 4.391(+04)       |
| 300  | 3.712(+00)                      | 1.687(+00)                | 3.596(+05)       |
| 400  | 5.935(+00)                      | 3.249(+00)                | 2.184(+06)       |
| 500  | 8.837(+00)                      | 5.431(+00)                | 1.138(+07)       |
| 600  | 1.241(+01)                      | 8.250(+00)                | 5.362(+07)       |
| 700  | 1.663(+01)                      | 1.170(+01)                | 2.338(+08)       |
| 800  | 2.148(+01)                      | 1.578(+01)                | 9.545(+08)       |
| 900  | 2.693(+01)                      | 2.046(+01)                | 3.674(+09)       |
| 1000 | 3.294(+01)                      | 2.572(+01)                | 1.340(+10)       |
| 1500 | 7.063(+01)                      | 5.978(+01)                | 4.349(+12)       |
| 2000 | 1.183(+02)                      | 1.043(+02)                | 5.651(+14)       |
| 2500 | 1.731(+02)                      | 1.566(+02)                | 3.694(+16)       |

Table S24: Translational, electronic, and rovibrational (MS-HO<sup>a</sup> and E2DT<sup>b</sup>) partition functions for the transition state of CRC1.  $Q_T^{\text{MS-HO}}$  and  $Q_T^{\text{E2DT}}$  stands for the total partition functions<sup>c</sup>. Power of 10 in parentheses.

| T(K) | $Q_{\text{trans}}$ | $Q_{\text{elec}}$ | $Q^{\text{MS-HO}}$ | $Q^{\text{E2DT}}$ | $Q_T^{\text{MS-HO}}$ | $Q_T^{\text{E2DT}}$ |
|------|--------------------|-------------------|--------------------|-------------------|----------------------|---------------------|
| 200  | 4.717(+01)         | 2.000(+00)        | 2.287(+05)         | 2.418(+05)        | 2.158(+07)           | 2.281(+07)          |
| 300  | 8.666(+01)         | 2.000(+00)        | 1.692(+06)         | 1.870(+06)        | 2.932(+08)           | 3.241(+08)          |
| 400  | 1.334(+02)         | 2.000(+00)        | 1.110(+07)         | 1.269(+07)        | 2.962(+09)           | 3.387(+09)          |
| 500  | 1.865(+02)         | 2.000(+00)        | 6.698(+07)         | 7.835(+07)        | 2.498(+10)           | 2.922(+10)          |
| 600  | 2.451(+02)         | 2.000(+00)        | 3.756(+08)         | 4.464(+08)        | 1.841(+11)           | 2.188(+11)          |
| 700  | 3.089(+02)         | 2.000(+00)        | 1.965(+09)         | 2.362(+09)        | 1.214(+12)           | 1.460(+12)          |
| 800  | 3.774(+02)         | 2.000(+00)        | 9.622(+09)         | 1.165(+10)        | 7.263(+12)           | 8.793(+12)          |
| 900  | 4.503(+02)         | 2.000(+00)        | 4.420(+10)         | 5.379(+10)        | 3.981(+13)           | 4.844(+13)          |
| 1000 | 5.274(+02)         | 2.000(+00)        | 1.911(+11)         | 2.332(+11)        | 2.016(+14)           | 2.460(+14)          |
| 1500 | 9.689(+02)         | 2.000(+00)        | 1.305(+14)         | 1.570(+14)        | 2.529(+17)           | 3.042(+17)          |
| 2000 | 1.492(+03)         | 2.000(+00)        | 3.088(+16)         | 3.569(+16)        | 9.214(+19)           | 1.065(+20)          |
| 2500 | 2.085(+03)         | 2.000(+00)        | 3.325(+18)         | 3.628(+18)        | 1.386(+22)           | 1.513(+22)          |

<sup>a</sup> MS-OH (ZPE): 54.459 kcal/mol

<sup>b</sup> E2DT (ZPE): 54.444 kcal/mol

<sup>c</sup>  $Q_T^X = Q_{\text{trans}}Q_{\text{elec}}Q_{\text{rovib}}^X$ , where X = MS-HO or E2DT

Table S25: Components of the E2DT partition function for the transition state of CRC1.  $Q_{\text{tor,cl}}^{(C)}$  is the classical torsional partition function,  $Q_{\text{tor}}^{2D-NS}$  a quantum version of the classical function, and  $Q^{\text{EHR}}$  the extended hindered-rotor (EHR) rovibrational partition function. Power of 10 in parentheses.

| T(K) | $Q_{\text{tor}}^{2D-NS}$ | $Q_{\text{tor,cl}}^{(C)}$ | $Q^{\text{EHR}}$ |
|------|--------------------------|---------------------------|------------------|
| 200  | 2.450(+00)               | 8.570(-01)                | 8.461(+04)       |
| 300  | 4.289(+00)               | 2.076(+00)                | 9.051(+05)       |
| 400  | 6.909(+00)               | 3.973(+00)                | 7.297(+06)       |
| 500  | 1.035(+01)               | 6.624(+00)                | 5.013(+07)       |
| 600  | 1.462(+01)               | 1.006(+01)                | 3.072(+08)       |
| 700  | 1.970(+01)               | 1.429(+01)                | 1.713(+09)       |
| 800  | 2.557(+01)               | 1.930(+01)                | 8.794(+09)       |
| 900  | 3.219(+01)               | 2.506(+01)                | 4.188(+10)       |
| 1000 | 3.952(+01)               | 3.154(+01)                | 1.861(+11)       |
| 1500 | 8.541(+01)               | 7.353(+01)                | 1.352(+14)       |
| 2000 | 1.437(+02)               | 1.281(+02)                | 3.182(+16)       |
| 2500 | 2.100(+02)               | 1.917(+02)                | 3.311(+18)       |

Table S26: Translational, electronic, and rovibrational (MS-HO<sup>a</sup> and E2DT<sup>b</sup>) partition functions for the transition state of CRC2.  $Q_T^{\text{MS-HO}}$  and  $Q_T^{\text{E2DT}}$  stands for the total partition functions<sup>c</sup>. Power of 10 in parentheses.

| T(K) | $Q_{\text{trans}}$ | $Q_{\text{elec}}$ | $Q^{\text{MS-HO}}$ | $Q^{\text{E2DT}}$ | $Q_T^{\text{MS-HO}}$ | $Q_T^{\text{E2DT}}$ |
|------|--------------------|-------------------|--------------------|-------------------|----------------------|---------------------|
| 200  | 4.717(+01)         | 2.000(+00)        | 3.846(+05)         | 4.188(+05)        | 3.628(+07)           | 3.951(+07)          |
| 300  | 8.666(+01)         | 2.000(+00)        | 3.899(+06)         | 4.301(+06)        | 6.757(+08)           | 7.454(+08)          |
| 400  | 1.334(+02)         | 2.000(+00)        | 3.177(+07)         | 3.470(+07)        | 8.479(+09)           | 9.261(+09)          |
| 500  | 1.865(+02)         | 2.000(+00)        | 2.204(+08)         | 2.356(+08)        | 8.220(+10)           | 8.787(+10)          |
| 600  | 2.451(+02)         | 2.000(+00)        | 1.353(+09)         | 1.407(+09)        | 6.632(+11)           | 6.896(+11)          |
| 700  | 3.089(+02)         | 2.000(+00)        | 7.513(+09)         | 7.568(+09)        | 4.642(+12)           | 4.676(+12)          |
| 800  | 3.774(+02)         | 2.000(+00)        | 3.829(+10)         | 3.728(+10)        | 2.890(+13)           | 2.814(+13)          |
| 900  | 4.503(+02)         | 2.000(+00)        | 1.808(+11)         | 1.699(+11)        | 1.628(+14)           | 1.530(+14)          |
| 1000 | 5.274(+02)         | 2.000(+00)        | 7.974(+11)         | 7.228(+11)        | 8.411(+14)           | 7.624(+14)          |
| 1500 | 9.689(+02)         | 2.000(+00)        | 5.687(+14)         | 4.326(+14)        | 1.102(+18)           | 8.382(+17)          |
| 2000 | 1.492(+03)         | 2.000(+00)        | 1.361(+17)         | 8.838(+16)        | 4.061(+20)           | 2.637(+20)          |
| 2500 | 2.085(+03)         | 2.000(+00)        | 1.472(+19)         | 8.301(+18)        | 6.138(+22)           | 3.461(+22)          |

<sup>a</sup> MS-OH (ZPE): 54.098 kcal/mol

<sup>b</sup> E2DT (ZPE): 54.088 kcal/mol

<sup>c</sup>  $Q_T^X = Q_{\text{trans}}Q_{\text{elec}}Q_{\text{rovib}}^X$ , where X = MS-HO or E2DT

Table S27: Components of the E2DT partition function for the transition state of CRC2.  $Q_{\text{tor,cl}}^{(C)}$  is the classical torsional partition function,  $Q_{\text{tor}}^{2D-NS}$  a quantum version of the classical function, and  $Q^{\text{EHR}}$  the extended hindered-rotor (EHR) rovibrational partition function. Power of 10 in parentheses.

| T(K) | $Q_{\text{tor}}^{2D-NS}$ | $Q_{\text{tor,cl}}^{(C)}$ | $Q^{\text{EHR}}$ |
|------|--------------------------|---------------------------|------------------|
| 200  | 3.063(+00)               | 1.203(+00)                | 1.646(+05)       |
| 300  | 6.087(+00)               | 3.201(+00)                | 2.261(+06)       |
| 400  | 1.058(+01)               | 6.486(+00)                | 2.127(+07)       |
| 500  | 1.649(+01)               | 1.112(+01)                | 1.588(+08)       |
| 600  | 2.371(+01)               | 1.704(+01)                | 1.011(+09)       |
| 700  | 3.209(+01)               | 2.415(+01)                | 5.696(+09)       |
| 800  | 4.149(+01)               | 3.234(+01)                | 2.905(+10)       |
| 900  | 5.178(+01)               | 4.148(+01)                | 1.361(+11)       |
| 1000 | 6.283(+01)               | 5.145(+01)                | 5.919(+11)       |
| 1500 | 1.266(+02)               | 1.107(+02)                | 3.784(+14)       |
| 2000 | 1.992(+02)               | 1.802(+02)                | 7.994(+16)       |
| 2500 | 2.768(+02)               | 2.554(+02)                | 7.660(+18)       |



Table S28: Translational, electronic, and rovibrational (MS-HO<sup>a</sup> and E2DT<sup>b</sup>) partition functions for the transition state of CRC3.  $Q_T^{\text{MS-HO}}$  and  $Q_T^{\text{E2DT}}$  stands for the total partition functions<sup>c</sup>. Power of 10 in parentheses.

| T(K) | $Q_{\text{trans}}$ | $Q_{\text{elec}}$ | $Q^{\text{MS-HO}}$ | $Q^{\text{E2DT}}$ | $Q_T^{\text{MS-HO}}$ | $Q_T^{\text{E2DT}}$ |
|------|--------------------|-------------------|--------------------|-------------------|----------------------|---------------------|
| 200  | 4.717(+01)         | 2.000(+00)        | 2.727(+05)         | 2.806(+05)        | 2.573(+07)           | 2.647(+07)          |
| 300  | 8.666(+01)         | 2.000(+00)        | 2.130(+06)         | 2.245(+06)        | 3.691(+08)           | 3.891(+08)          |
| 400  | 1.334(+02)         | 2.000(+00)        | 1.420(+07)         | 1.504(+07)        | 3.790(+09)           | 4.014(+09)          |
| 500  | 1.865(+02)         | 2.000(+00)        | 8.623(+07)         | 9.071(+07)        | 3.216(+10)           | 3.383(+10)          |
| 600  | 2.451(+02)         | 2.000(+00)        | 4.877(+08)         | 5.072(+08)        | 2.390(+11)           | 2.486(+11)          |
| 700  | 3.089(+02)         | 2.000(+00)        | 2.583(+09)         | 2.653(+09)        | 1.596(+12)           | 1.639(+12)          |
| 800  | 3.774(+02)         | 2.000(+00)        | 1.283(+10)         | 1.302(+10)        | 9.684(+12)           | 9.827(+12)          |
| 900  | 4.503(+02)         | 2.000(+00)        | 5.987(+10)         | 6.005(+10)        | 5.392(+13)           | 5.408(+13)          |
| 1000 | 5.274(+02)         | 2.000(+00)        | 2.630(+11)         | 2.610(+11)        | 2.774(+14)           | 2.753(+14)          |
| 1500 | 9.689(+02)         | 2.000(+00)        | 1.933(+14)         | 1.814(+14)        | 3.745(+17)           | 3.515(+17)          |
| 2000 | 1.492(+03)         | 2.000(+00)        | 4.823(+16)         | 4.252(+16)        | 1.439(+20)           | 1.269(+20)          |
| 2500 | 2.085(+03)         | 2.000(+00)        | 5.396(+18)         | 4.433(+18)        | 2.250(+22)           | 1.848(+22)          |

<sup>a</sup> MS-OH (ZPE): 54.042 kcal/mol

<sup>b</sup> E2DT (ZPE): 54.038 kcal/mol

<sup>c</sup>  $Q_T^X = Q_{\text{trans}}Q_{\text{elec}}Q_{\text{rovib}}^X$ , where X = MS-HO or E2DT

Table S29: Components of the E2DT partition function for the transition state of CRC3.  $Q_{\text{tor,cl}}^{(C)}$  is the classical torsional partition function,  $Q_{\text{tor}}^{2D-NS}$  a quantum version of the classical function, and  $Q^{\text{EHR}}$  the extended hindered-rotor (EHR) rovibrational partition function. Power of 10 in parentheses.

| T(K) | $Q_{\text{tor}}^{2D-NS}$ | $Q_{\text{tor,cl}}^{(C)}$ | $Q^{\text{EHR}}$ |
|------|--------------------------|---------------------------|------------------|
| 200  | 2.597(+00)               | 9.633(-01)                | 1.041(+05)       |
| 300  | 4.477(+00)               | 2.265(+00)                | 1.136(+06)       |
| 400  | 6.941(+00)               | 4.136(+00)                | 8.958(+06)       |
| 500  | 1.002(+01)               | 6.604(+00)                | 5.976(+07)       |
| 600  | 1.376(+01)               | 9.707(+00)                | 3.577(+08)       |
| 700  | 1.819(+01)               | 1.347(+01)                | 1.965(+09)       |
| 800  | 2.330(+01)               | 1.791(+01)                | 1.001(+10)       |
| 900  | 2.910(+01)               | 2.303(+01)                | 4.752(+10)       |
| 1000 | 3.557(+01)               | 2.882(+01)                | 2.114(+11)       |
| 1500 | 7.695(+01)               | 6.688(+01)                | 1.576(+14)       |
| 2000 | 1.306(+02)               | 1.174(+02)                | 3.822(+16)       |
| 2500 | 1.928(+02)               | 1.770(+02)                | 4.071(+18)       |

Table S30: Translational, electronic, and rovibrational (MS-HO<sup>a</sup> and E2DT<sup>b</sup>) partition functions for the transition state of CRC4.  $Q_T^{\text{MS-HO}}$  and  $Q_T^{\text{E2DT}}$  stands for the total partition functions<sup>c</sup>. Power of 10 in parentheses.

| T(K) | $Q_{\text{trans}}$ | $Q_{\text{elec}}$ | $Q^{\text{MS-HO}}$ | $Q^{\text{E2DT}}$ | $Q_T^{\text{MS-HO}}$ | $Q_T^{\text{E2DT}}$ |
|------|--------------------|-------------------|--------------------|-------------------|----------------------|---------------------|
| 200  | 4.717(+01)         | 2.000(+00)        | 4.353(+05)         | 4.154(+05)        | 4.107(+07)           | 3.919(+07)          |
| 300  | 8.666(+01)         | 2.000(+00)        | 3.040(+06)         | 2.966(+06)        | 5.268(+08)           | 5.140(+08)          |
| 400  | 1.334(+02)         | 2.000(+00)        | 1.884(+07)         | 1.900(+07)        | 5.028(+09)           | 5.071(+09)          |
| 500  | 1.865(+02)         | 2.000(+00)        | 1.082(+08)         | 1.133(+08)        | 4.035(+10)           | 4.226(+10)          |
| 600  | 2.451(+02)         | 2.000(+00)        | 5.826(+08)         | 6.347(+08)        | 2.856(+11)           | 3.111(+11)          |
| 700  | 3.089(+02)         | 2.000(+00)        | 2.952(+09)         | 3.346(+09)        | 1.824(+12)           | 2.068(+12)          |
| 800  | 3.774(+02)         | 2.000(+00)        | 1.409(+10)         | 1.659(+10)        | 1.064(+13)           | 1.252(+13)          |
| 900  | 4.503(+02)         | 2.000(+00)        | 6.338(+10)         | 7.743(+10)        | 5.708(+13)           | 6.973(+13)          |
| 1000 | 5.274(+02)         | 2.000(+00)        | 2.695(+11)         | 3.405(+11)        | 2.843(+14)           | 3.592(+14)          |
| 1500 | 9.689(+02)         | 2.000(+00)        | 1.750(+14)         | 2.506(+14)        | 3.391(+17)           | 4.856(+17)          |
| 2000 | 1.492(+03)         | 2.000(+00)        | 4.041(+16)         | 6.163(+16)        | 1.206(+20)           | 1.839(+20)          |
| 2500 | 2.085(+03)         | 2.000(+00)        | 4.290(+18)         | 6.684(+18)        | 1.789(+22)           | 2.787(+22)          |

<sup>a</sup> MS-OH (ZPE): 54.175 kcal/mol

<sup>b</sup> E2DT (ZPE): 54.167 kcal/mol

<sup>c</sup>  $Q_T^X = Q_{\text{trans}}Q_{\text{elec}}Q_{\text{rovib}}^X$ , where X = MS-HO or E2DT

Table S31: Components of the E2DT partition function for the transition state of CRC4.  $Q_{\text{tor,cl}}^{(C)}$  is the classical torsional partition function,  $Q_{\text{tor}}^{2D-NS}$  a quantum version of the classical function, and  $Q^{\text{EHR}}$  the extended hindered-rotor (EHR) rovibrational partition function. Power of 10 in parentheses.

| T(K) | $Q_{\text{tor}}^{2D-NS}$ | $Q_{\text{tor,cl}}^{(C)}$ | $Q^{\text{EHR}}$ |
|------|--------------------------|---------------------------|------------------|
| 200  | 4.552(+00)               | 1.577(+00)                | 1.438(+05)       |
| 300  | 7.945(+00)               | 3.816(+00)                | 1.425(+06)       |
| 400  | 1.291(+01)               | 7.377(+00)                | 1.085(+07)       |
| 500  | 1.964(+01)               | 1.249(+01)                | 7.201(+07)       |
| 600  | 2.825(+01)               | 1.931(+01)                | 4.339(+08)       |
| 700  | 3.885(+01)               | 2.800(+01)                | 2.411(+09)       |
| 800  | 5.151(+01)               | 3.863(+01)                | 1.244(+10)       |
| 900  | 6.627(+01)               | 5.127(+01)                | 5.991(+10)       |
| 1000 | 8.314(+01)               | 6.596(+01)                | 2.702(+11)       |
| 1500 | 1.980(+02)               | 1.696(+02)                | 2.146(+14)       |
| 2000 | 3.584(+02)               | 3.187(+02)                | 5.481(+16)       |
| 2500 | 5.545(+02)               | 5.048(+02)                | 6.085(+18)       |

Table S32: The ratio between anharmonic and harmonic total partition function,  $F^{\text{E2DT},X}$ , calculated by the Eq. (21).

| T(K) | (2)-2-butenal | CRC1  | CRC2  | CRC2  | CRC4  |
|------|---------------|-------|-------|-------|-------|
| 200  | 0.999         | 1.098 | 1.117 | 1.039 | 0.974 |
| 300  | 1.031         | 1.133 | 1.122 | 1.061 | 0.989 |
| 400  | 1.062         | 1.165 | 1.106 | 1.064 | 1.019 |
| 500  | 1.086         | 1.188 | 1.080 | 1.056 | 1.056 |
| 600  | 1.102         | 1.204 | 1.049 | 1.043 | 1.097 |
| 700  | 1.113         | 1.215 | 1.015 | 1.030 | 1.140 |
| 800  | 1.120         | 1.222 | 0.980 | 1.017 | 1.183 |
| 900  | 1.125         | 1.227 | 0.945 | 1.005 | 1.227 |
| 1000 | 1.128         | 1.230 | 0.911 | 0.994 | 1.269 |
| 1500 | 1.119         | 1.209 | 0.763 | 0.940 | 1.436 |
| 2000 | 1.082         | 1.160 | 0.651 | 0.882 | 1.528 |
| 2500 | 1.032         | 1.094 | 0.565 | 0.822 | 1.561 |

Table S33: Recrossing ( $\Gamma_j^{\text{CVT}}$ ) and quantum tunneling ( $\kappa_j^{\text{CVT/SCT}}$ ) coefficients for the individual paths of CRC1.

| T(K) | Path 1                  |                             | Path 2                  |                             |
|------|-------------------------|-----------------------------|-------------------------|-----------------------------|
|      | $\Gamma_1^{\text{CVT}}$ | $\kappa_1^{\text{CVT/SCT}}$ | $\Gamma_2^{\text{CVT}}$ | $\kappa_2^{\text{CVT/SCT}}$ |
| 200  | 0.9991                  | 11.7470                     | 0.9986                  | 10.6270                     |
| 300  | 0.9992                  | 3.0452                      | 0.9988                  | 2.9041                      |
| 400  | 0.9993                  | 1.8798                      | 0.9988                  | 1.8291                      |
| 500  | 0.9993                  | 1.5002                      | 0.9988                  | 1.4739                      |
| 600  | 0.9993                  | 1.3262                      | 0.9988                  | 1.3099                      |
| 700  | 0.9993                  | 1.2309                      | 0.9987                  | 1.2197                      |
| 800  | 0.9993                  | 1.1726                      | 0.9986                  | 1.1644                      |
| 900  | 0.9993                  | 1.1341                      | 0.9985                  | 1.1279                      |
| 1000 | 0.9993                  | 1.1074                      | 0.9985                  | 1.1024                      |
| 1500 | 0.9993                  | 1.0464                      | 0.9982                  | 1.0444                      |
| 2000 | 0.9812                  | 1.0259                      | 0.9639                  | 1.0247                      |
| 2500 | 0.9512                  | 1.0165                      | 0.9349                  | 1.0158                      |

Table S34: Recrossing ( $\Gamma_j^{\text{CVT}}$ ) and quantum tunneling ( $\kappa_j^{\text{CVT/SCT}}$ ) coefficients for the individual paths of CRC2.

| T(K) | Path 1                  |                             | Path 2                  |                             |
|------|-------------------------|-----------------------------|-------------------------|-----------------------------|
|      | $\Gamma_1^{\text{CVT}}$ | $\kappa_1^{\text{CVT/SCT}}$ | $\Gamma_2^{\text{CVT}}$ | $\kappa_2^{\text{CVT/SCT}}$ |
| 200  | 0.6374                  | 9.3735                      | 0.6324                  | 9.5113                      |
| 300  | 0.8289                  | 2.4135                      | 0.5076                  | 2.4041                      |
| 400  | 0.9448                  | 1.6072                      | 0.4478                  | 1.6008                      |
| 500  | 0.9886                  | 1.3468                      | 0.4130                  | 1.3427                      |
| 600  | 0.9956                  | 1.2270                      | 0.3905                  | 1.2242                      |
| 700  | 0.9986                  | 1.1610                      | 0.3751                  | 1.1590                      |
| 800  | 0.9997                  | 1.1206                      | 0.3641                  | 1.1190                      |
| 900  | 1.0000                  | 1.0938                      | 0.3559                  | 1.0926                      |
| 1000 | 0.9999                  | 1.0752                      | 0.3497                  | 1.0742                      |
| 1500 | 0.9978                  | 1.0326                      | 0.3332                  | 1.0322                      |
| 2000 | 0.9962                  | 1.0182                      | 0.3265                  | 1.0179                      |
| 2500 | 0.9952                  | 1.0116                      | 0.3231                  | 1.0114                      |

Table S35: Recrossing ( $\Gamma_j^{\text{CVT}}$ ) and quantum tunneling ( $\kappa_j^{\text{CVT/SCT}}$ ) coefficients for the individual paths of CRC3.

| T(K) | Path 1                  |                             | Path 2                  |                             |
|------|-------------------------|-----------------------------|-------------------------|-----------------------------|
|      | $\Gamma_1^{\text{CVT}}$ | $\kappa_1^{\text{CVT/SCT}}$ | $\Gamma_2^{\text{CVT}}$ | $\kappa_2^{\text{CVT/SCT}}$ |
| 200  | 0.4558                  | 49.6950                     | 0.8426                  | 34.2550                     |
| 300  | 0.6318                  | 4.5794                      | 0.9905                  | 3.8875                      |
| 400  | 0.7433                  | 2.2620                      | 0.9998                  | 2.0674                      |
| 500  | 0.8155                  | 1.6680                      | 0.9962                  | 1.5755                      |
| 600  | 0.8602                  | 1.4211                      | 0.9829                  | 1.3661                      |
| 700  | 0.8894                  | 1.2924                      | 0.9664                  | 1.2556                      |
| 800  | 0.9093                  | 1.2160                      | 0.9505                  | 1.1894                      |
| 900  | 0.9233                  | 1.1666                      | 0.9368                  | 1.1464                      |
| 1000 | 0.9334                  | 1.1327                      | 0.9253                  | 1.1168                      |
| 1500 | 0.9306                  | 1.0567                      | 0.8913                  | 1.0501                      |
| 2000 | 0.9188                  | 1.0314                      | 0.8764                  | 1.0278                      |
| 2500 | 0.9121                  | 1.0200                      | 0.8684                  | 1.0177                      |

Table S36: Recrossing ( $\Gamma_j^{\text{CVT}}$ ) and quantum tunneling ( $\kappa_j^{\text{CVT/SCT}}$ ) coefficients for the individual paths of CRC4.

| T(K) | Path 1                  |                             | Path 2                  |                             |
|------|-------------------------|-----------------------------|-------------------------|-----------------------------|
|      | $\Gamma_1^{\text{CVT}}$ | $\kappa_1^{\text{CVT/SCT}}$ | $\Gamma_2^{\text{CVT}}$ | $\kappa_2^{\text{CVT/SCT}}$ |
| 200  | 0.7450                  | 229.8700                    | 0.9311                  | 388.5400                    |
| 300  | 0.7931                  | 12.0780                     | 0.9115                  | 18.3720                     |
| 400  | 0.8139                  | 4.2518                      | 0.8924                  | 5.6642                      |
| 500  | 0.8241                  | 2.5830                      | 0.8766                  | 3.1622                      |
| 600  | 0.8295                  | 1.9546                      | 0.8639                  | 2.2682                      |
| 700  | 0.8323                  | 1.6458                      | 0.8538                  | 1.8434                      |
| 800  | 0.8338                  | 1.4692                      | 0.8456                  | 1.6059                      |
| 900  | 0.8345                  | 1.3578                      | 0.8388                  | 1.4585                      |
| 1000 | 0.8348                  | 1.2826                      | 0.8331                  | 1.3602                      |
| 1500 | 0.7643                  | 1.1184                      | 0.8141                  | 1.1490                      |
| 2000 | 0.7569                  | 1.0653                      | 0.8034                  | 1.0817                      |
| 2500 | 0.7518                  | 1.0414                      | 0.7965                  | 1.0517                      |

Table S37: Harmonic 1W-CVT/SCT thermal rate constants for (R1)–(R4) in a wide range of temperatures<sup>a</sup>. All rate constants are in cm<sup>3</sup> molecule<sup>-1</sup> s<sup>-1</sup>.

| T(K) | (R1)      | (R2)      | (R3)      | (R4)      |
|------|-----------|-----------|-----------|-----------|
| 200  | 1.04(-14) | 6.01(-28) | 2.47(-24) | 1.50(-16) |
| 300  | 7.14(-14) | 1.49(-22) | 1.94(-20) | 2.65(-15) |
| 400  | 2.47(-13) | 1.09(-19) | 3.11(-18) | 1.83(-14) |
| 500  | 5.95(-13) | 5.54(-18) | 7.85(-17) | 7.09(-14) |
| 600  | 1.16(-12) | 9.23(-17) | 7.38(-16) | 1.95(-13) |
| 700  | 1.97(-12) | 7.28(-16) | 3.91(-15) | 4.30(-13) |
| 800  | 3.06(-12) | 3.56(-15) | 1.43(-14) | 8.17(-13) |
| 900  | 4.44(-12) | 1.26(-14) | 4.03(-14) | 1.39(-12) |
| 1000 | 6.13(-12) | 3.55(-14) | 9.47(-14) | 2.19(-12) |
| 1500 | 1.94(-11) | 9.47(-13) | 1.49(-12) | 1.05(-11) |
| 2000 | 4.06(-11) | 5.73(-12) | 6.27(-12) | 2.69(-11) |
| 2500 | 6.91(-11) | 1.85(-11) | 1.74(-11) | 4.98(-11) |

<sup>a</sup> Power of 10 in parentheses.

Table S38: Harmonic MP-CVT/SCT thermal rate constants for (R1)–(R4) in a wide range of temperatures<sup>a</sup>. All rate constants are in cm<sup>3</sup> molecule<sup>-1</sup> s<sup>-1</sup>.

| T(K) | (R1)      | (R2)      | (R3)      | (R4)      |
|------|-----------|-----------|-----------|-----------|
| 200  | 1.03(-14) | 6.16(-28) | 2.47(-24) | 1.96(-16) |
| 300  | 7.08(-14) | 1.55(-22) | 1.87(-20) | 3.24(-15) |
| 400  | 2.52(-13) | 1.14(-19) | 2.89(-18) | 2.16(-14) |
| 500  | 6.25(-13) | 5.88(-18) | 7.12(-17) | 8.13(-14) |
| 600  | 1.25(-12) | 9.70(-17) | 6.61(-16) | 2.17(-13) |
| 700  | 2.19(-12) | 7.56(-16) | 3.48(-15) | 4.69(-13) |
| 800  | 3.46(-12) | 3.66(-15) | 1.27(-14) | 8.74(-13) |
| 900  | 5.11(-12) | 1.28(-14) | 3.60(-14) | 1.47(-12) |
| 1000 | 7.16(-12) | 3.57(-14) | 8.54(-14) | 2.29(-12) |
| 1500 | 2.38(-11) | 9.19(-13) | 1.27(-12) | 9.96(-12) |
| 2000 | 4.83(-11) | 5.45(-12) | 6.32(-12) | 2.56(-11) |
| 2500 | 8.15(-11) | 1.73(-11) | 1.82(-11) | 4.97(-11) |

<sup>a</sup> Power of 10 in parentheses.
